# Supplementary material for: Inhibition of ATM reverses EMT and decreases metastatic potential of cisplatin-resistant lung cancer cells through JAK/STAT3/PD-L1 pathway
Source: Springer Nature journal article supplement (doi:10.1186/s13046-019-1161-8), 2019-04-08

# Supplementary Figure 1

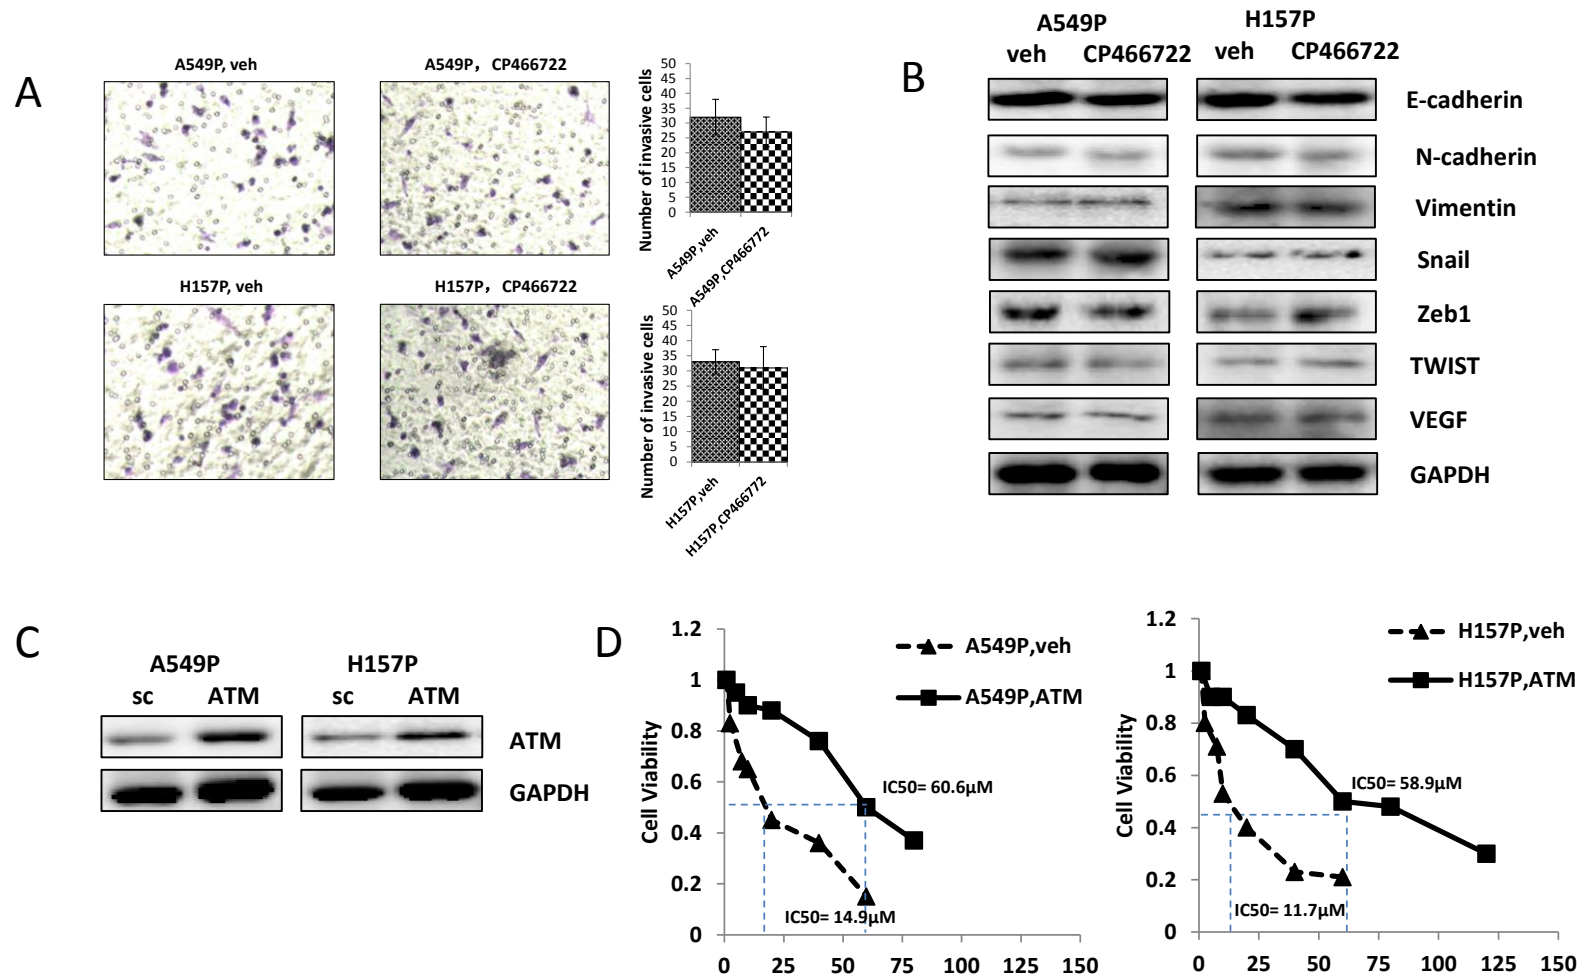

Supplement: MOESM1 [file 16629864]
